# Supplementary material for: Randomised, multicentre prospective trial of transarterial chemoembolisation (TACE) plus sorafenib as compared with TACE alone in patients with hepatocellular carcinoma: TACTICS trial
Source: PubMed Central journal article supplement — Gut. 2019 Dec 4;69(8):1492–501. doi: 10.1136/gutjnl-2019-318934 (PMC7398460; doi:10.1136/gutjnl-2019-318934), 2019-12-04
Supplement: gutjnl-2019-318934supp002.pdf [file gutjnl-2019-318934supp002.pdf]

Supplementary Table 1. **Factors of unTACEable** progression in patients treated with TACE plus sorafenib and TACE alone.

|                                                                     | <b>TACE plus sorafenib (n=80)</b> | <b>TACE alone (n=76)</b> |
|---------------------------------------------------------------------|-----------------------------------|--------------------------|
| No progression                                                      | 30                                | 27                       |
| Progression pattern                                                 | 50                                | 49                       |
| Intrahepatic lesion <b>growth&gt;25%<br/>or TACE refractoriness</b> | 24                                | 31                       |
| Vascular Invasion                                                   | 11                                | 8                        |
| Extrahepatic spread                                                 | 13                                | 8                        |
| Deterioration of liver <b>function to<br/>Child-Pugh C</b>          | 2                                 | 2                        |
|                                                                     |                                   |                          |

Numbers are expressed as number of patients.
