# Supplementary figures and images for: Randomised, multicentre prospective trial of transarterial chemoembolisation (TACE) plus sorafenib as compared with TACE alone in patients with hepatocellular carcinoma: TACTICS trial
Source: PubMed Central journal article supplement — Gut. 2019 Dec 4;69(8):1492–501. doi: 10.1136/gutjnl-2019-318934 (PMC7398460; doi:10.1136/gutjnl-2019-318934), 2019-12-04

Supplementary Figure 1.

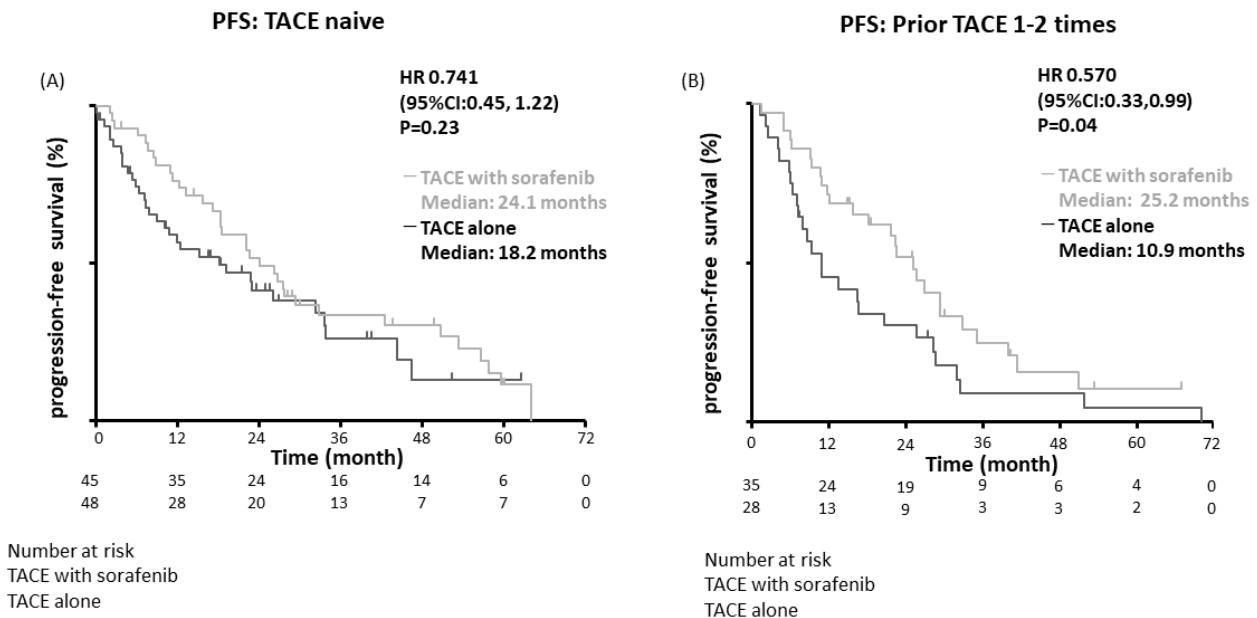

Supplement: gutjnl-2019-318934supp001.pdf [file gutjnl-2019-318934supp001.pdf]

Supplementary Figure 2.

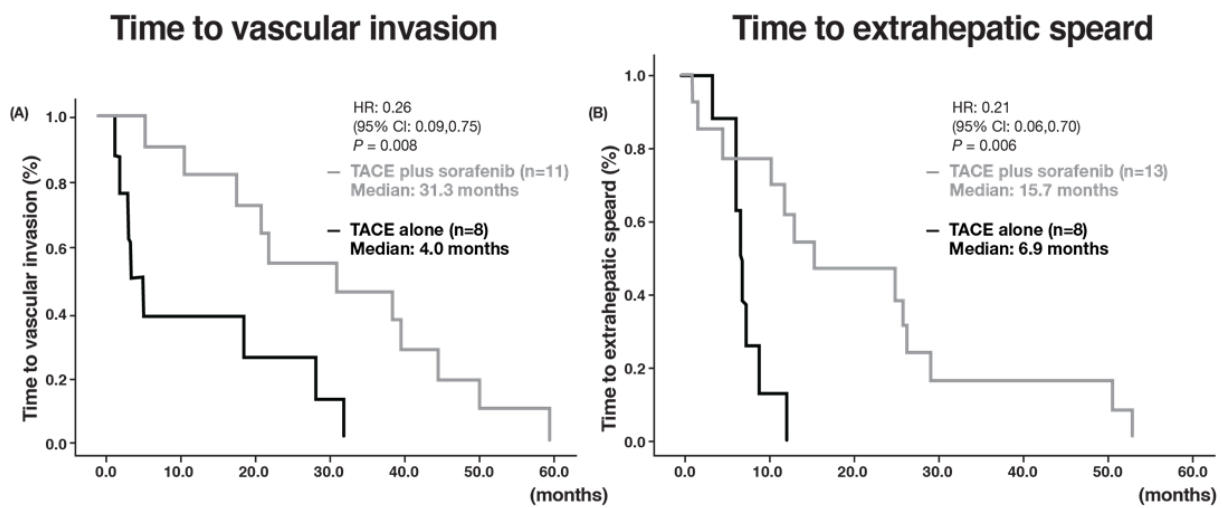

Supplement: gutjnl-2019-318934supp003.pdf [file gutjnl-2019-318934supp003.pdf]

Supplementary Figure 3.

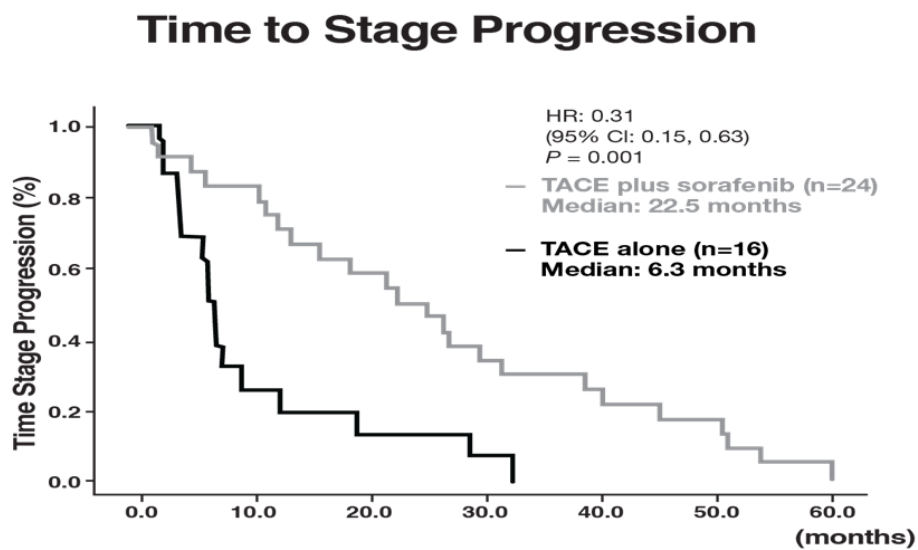

Supplement: gutjnl-2019-318934supp004.pdf [file gutjnl-2019-318934supp004.pdf]
